# Supplementary material for: Atomic tuning of 3D printed carbon surface chemistry for electrocatalytic nitrite oxidation and reduction to ammonia
Source: Royal Society of Chemistry journal article supplement (doi:10.1039/d4ta06800a), 2024-01-01
Supplement: d4ta06800a1.pdf [file d4ta06800a1.pdf]

## Supplementary Information

Atomic tuning of 3D printed carbon surface chemistry for  
electrocatalytic nitrite oxidation and reduction to ammonia

*Wanli Gao<sup>a</sup>, Jan Michalička<sup>b</sup>, and Martin Pumera<sup>a,c,d\*</sup>*

<sup>a</sup>Future Energy and Innovation Laboratory, Central European Institute of Technology, Brno  
University of Technology, Purkyňova 123, 61200 Brno, Czech Republic

<sup>b</sup>Central European Institute of Technology, Brno University of Technology, Purkyňova 123, 61200  
Brno, Czech Republic

<sup>c</sup>Faculty of Electrical Engineering and Computer Science, VSB - Technical University of Ostrava,  
17. listopadu 2172/15, 70800 Ostrava, Czech Republic

<sup>d</sup>Department of Medical Research, China Medical University Hospital, China Medical University,  
No. 91 Hsueh-Shih Road, Taichung 40402, Taiwan

E-mail: martin.pumera@ceitec.vutbr.cz

## **Ti content determination by inductively coupled plasma optical emission spectrometry (ICP-OES)**

Before ICP-OES measurement, the 1D@TiO<sub>2</sub> electrode had to be dissolved using a microwave digestion procedure. The electrode was accurately weighed on a microbalance (Radwag MYA 5.6.Y) and placed in a teflon tube. A reaction mixture consisting of 2 ml HNO<sub>3</sub>, 2 ml H<sub>2</sub>O<sub>2</sub>, 5 ml HClO<sub>4</sub> and 1 ml HF (all Analpure grade, Analytika s.r.o., Czech Republic) was added and the tube was placed in a microwave digestion unit (Magnum II, Ertec, Poland). After 30 minutes of four-step digestion procedure utilizing limits up to 300 °C and 42 bar, the samples were transferred into plastic tubes, diluted with demineralized water and spiked with yttrium (serving as internal standard) solution (Analytika s.r.o., Czech Republic) to obtain final Y concentration 2 mg/l. The samples were subsequently analyzed by ICP-OES with a radial view of the plasma (Arcos MV, Spectro, Germany). An external calibration in the range 0 - 10 mg/l Ti and Fe with 2 mg/l Y as an internal standard was used. Certified standard solutions Ti and Fe (multielemental, 100 mg/l each) and Y (1000 mg/l) from Analytika s.r.o., Czech Republic, nitric acid (Analpure grade, Analytika s.r.o., Czech Republic) and demineralized water were used to prepare the calibration solutions.

## **Differential scanning calorimetry (DSC)**

DSC measurements were conducted using the DSC600 Thermal Analysis System (HITACHI) under a nitrogen atmosphere. Samples with a mass of ~ 3 mg were used for each DSC measurement. Each sample was heated from 20 °C to 210 °C at a heating rate of 10 °C/min to obtain the melting curve. The Fusion enthalpy and cold crystallization enthalpy (if exists) will be used to calculate the crystallinity degree of PLA [1]. The degree of crystallinity ( $X_c$ ) of PLA is calculated by the following equation:

$$X_c = \frac{\Delta H_f - \Delta H_{fc}}{\phi H_f^*} \times 100 \%$$

where  $\phi$  is the weight fraction of PLA in the 3D-printed nanocarbon frameworks (around 86 %),  $\Delta H_f$  is fusion enthalpy,  $\Delta H_{fc}$  is cold crystallization enthalpy, and  $H_f^*$  is the fusion enthalpy of 100% crystalline PLA (93 J g<sup>-1</sup>).

### Calculation of electrochemically active surface area (ECSA):

To determine the electrochemical double-layer capacitance ( $C_{DL}$ ), cyclic voltammetry was conducted in a non-Faradaic potential range at different scan rates. The double-layer current ( $i_{DL}$ ), scan rate ( $\nu$ ), and  $C_{DL}$  exhibit a linear relationship of  $i_{DL} = \nu C_{DL}$ . The value of  $C_{DL}$  can be obtained from the slope of  $i_{DL}$  plotted against  $\nu$ . The average of the absolute values of the anodic and cathodic slopes is used as  $C_{DL}$ . The ECSA was then calculated using the equation  $ECSA = C_{DL} / C_s$ , where  $C_s = 22 \mu\text{F cm}^{-2}$  is for the specific capacitance of the carbon material [2].

### Calculation of NH<sub>3</sub> yield rate and the Faradaic efficiency (FE):

The NH<sub>3</sub> yield rate ( $r_{NH_3}$ ) and FE were calculated using the following equations:

$$r_{NH_3} = (17c_{NH_3} \times V) / (t \times S)$$

$$FE = (8F \times c_{NH_3} \times V) / Q$$

where  $c_{NH_3}$  is the concentration of measured NH<sub>3</sub>, V is the electrolyte volume of the cathodic compartment, t is the reaction time, S is the geometric area of working electrode, F is the Faradaic constant (96485 C mol<sup>-1</sup>), and Q is the total charge passing the electrode.

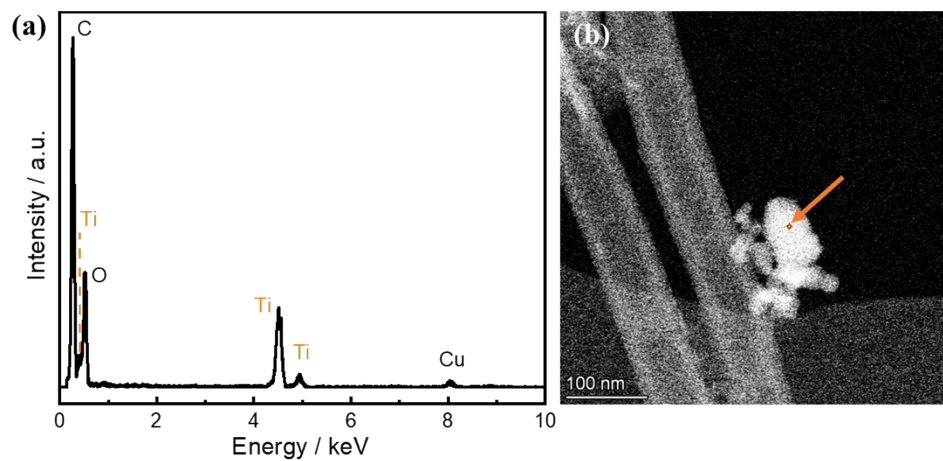

**Figure S1.** (a) STEM-EDX point spectrum marked by the arrow in the image of (b), showing that the Ti-based impurities exist on the surface of the carbon nanotube. The Cu signal is from the TEM grid.

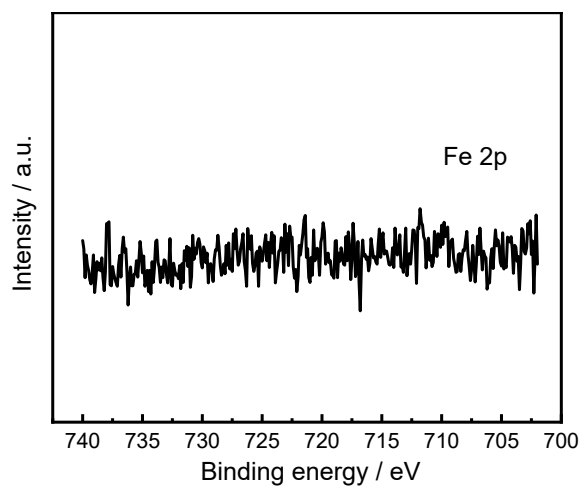

**Figure S2.** High-resolution Fe 2p core level spectrum of the 1D carbon substrate.

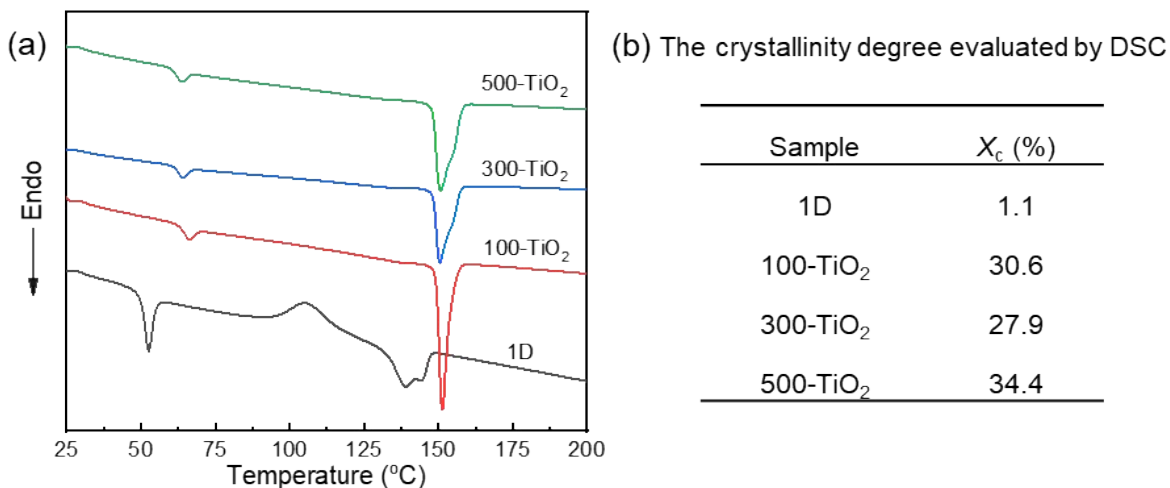

**Figure S3.** (a) DSC first heating curve of 1D carbon substrate, 100-TiO<sub>2</sub>, 300-TiO<sub>2</sub>, and 500-TiO<sub>2</sub>.

(b) The crystallinity degree evaluated from DSC curves in (a).

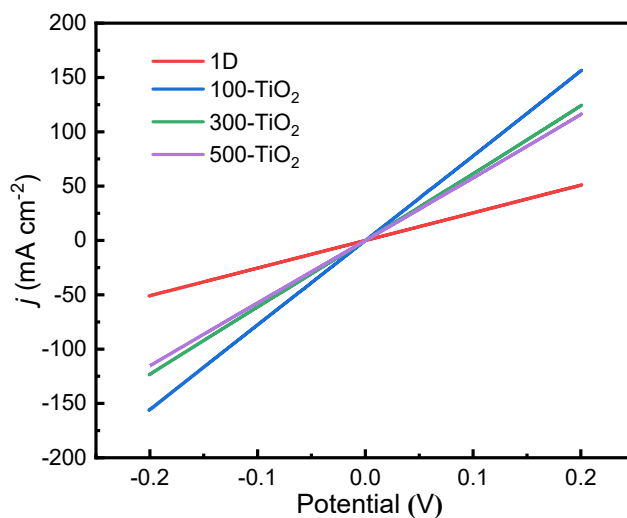

**Figure S4.** Conductivity test for 1D, 100-TiO<sub>2</sub>, 300-TiO<sub>2</sub>, and 500-TiO<sub>2</sub> electrodes. The electrodes are fixed between two stainless-steel rods and assembled in a Swagelok-type cell. The scan rate is 50 mV s<sup>-1</sup>.

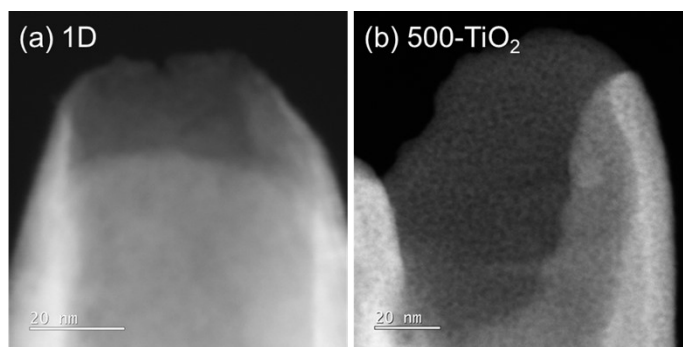

**Figure S5.** STEM-HAADF images of (a) 1D and (b) 500-TiO<sub>2</sub>, showing ALD-coated TiO<sub>2</sub> nanoclusters on the surface of 1D carbon substrate.

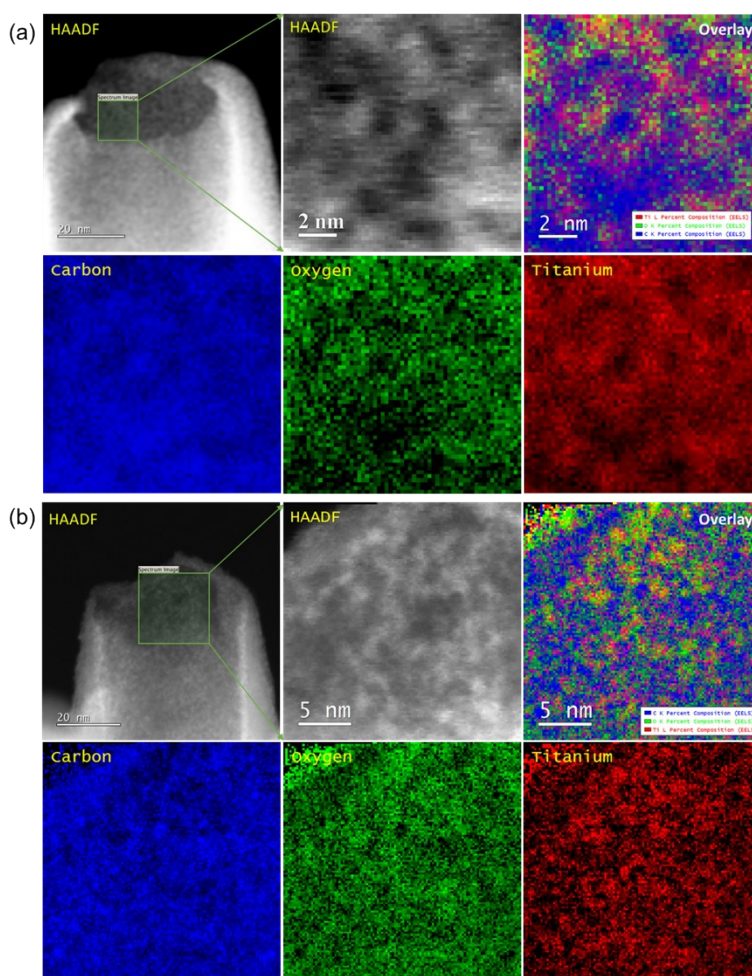

**Figure S6.** STEM-HAADF images of two different carbon nanotubes from 100-TiO<sub>2</sub> electrode, and corresponding STEM-EELS maps of C-K, O-K and Ti-L signal complemented with an overlay of all three maps.

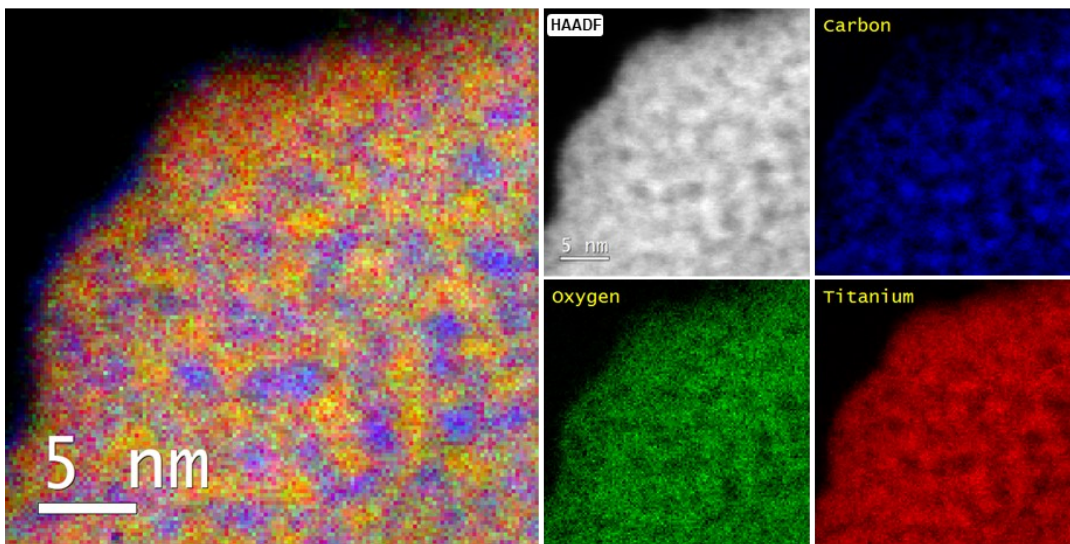

**Figure S7.** STEM-EELS analysis of the 500-TiO<sub>2</sub> electrode, showing almost continuous ALD-coated TiO<sub>2</sub> nanoclusters on the surface of the carbon nanotube.

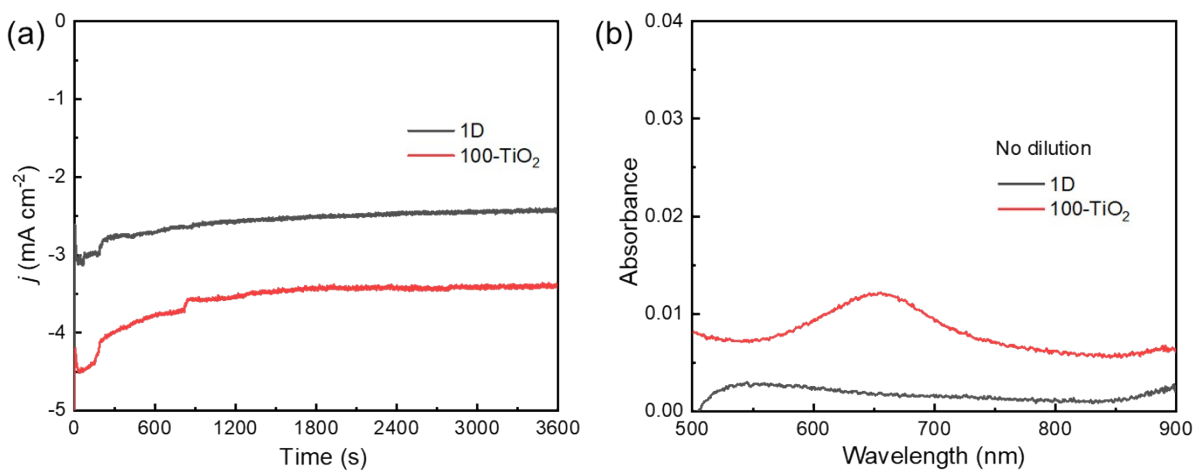

**Figure S8.** (a) Chronoamperometry curves of 1D and 100-TiO<sub>2</sub> electrodes at -1.06 V vs. RHE in a solution containing only 0.5 M Na<sub>2</sub>SO<sub>4</sub>, and (b) corresponding UV-vis absorption spectra of the electrolysis solutions.

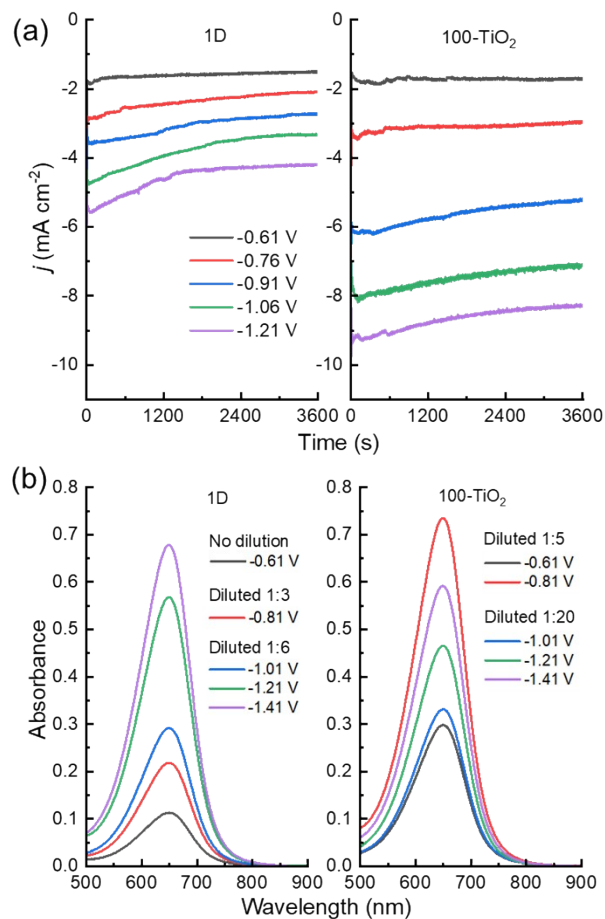

**Figure S9.** (a) Chronoamperometry curves of 1D and 100-TiO<sub>2</sub> electrodes at different potentials, and (b) corresponding UV-vis absorption spectra of the electrolysis solutions.

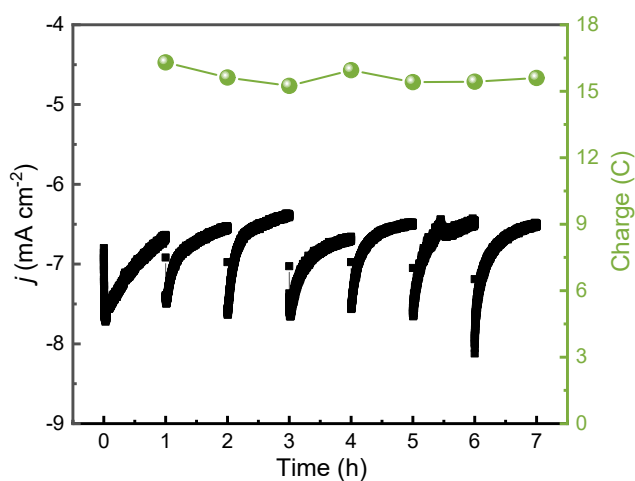

**Figure S10.** Current density and charge consumption for 100-TiO<sub>2</sub> electrode over 7 consecutive NH<sub>3</sub> production cycles at -1.06 V vs. RHE (1 hour per cycle) with refreshed electrolyte.



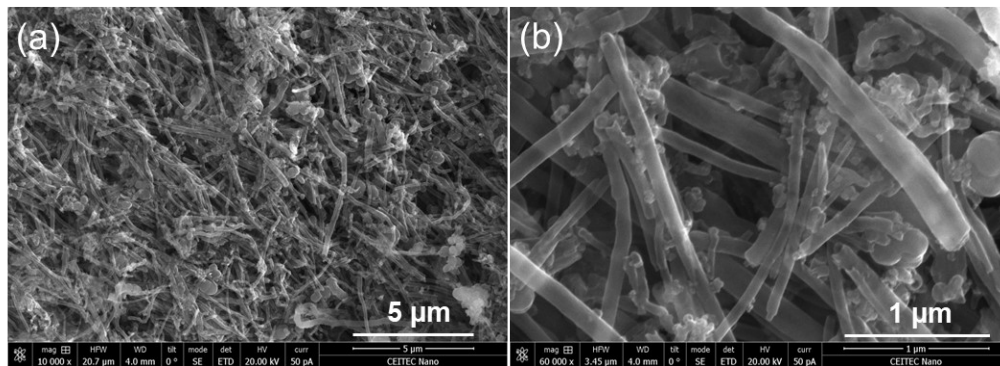

**Figure S11.** SEM images of 100-TiO<sub>2</sub> electrode after electrolysis cycling test.

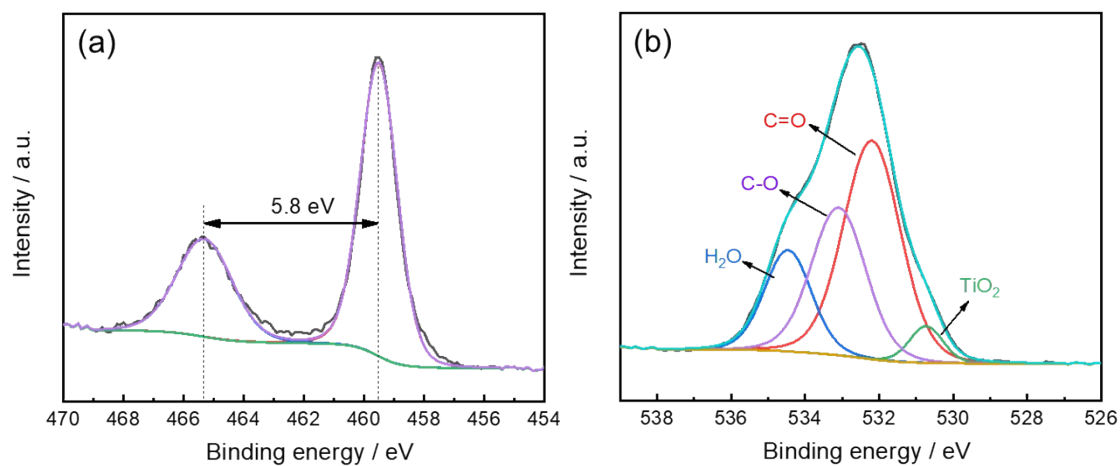

**Figure S12.** Ti 2p and O 1s high-resolution spectra of 100-TiO<sub>2</sub> electrode after electrolysis cycling test.

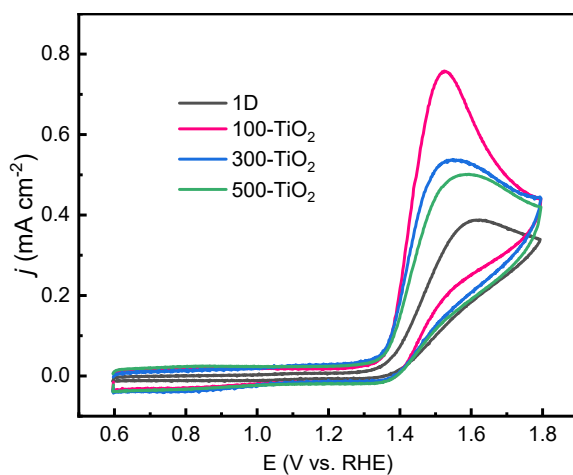

**Figure S13.** (a) CV curves of 1D, 100-TiO<sub>2</sub>, 300-TiO<sub>2</sub>, and 500-TiO<sub>2</sub> electrodes at 50 mV s<sup>-1</sup> in the presence of 1 mM NaNO<sub>2</sub> in 0.5 M Na<sub>2</sub>SO<sub>4</sub> electrolyte.

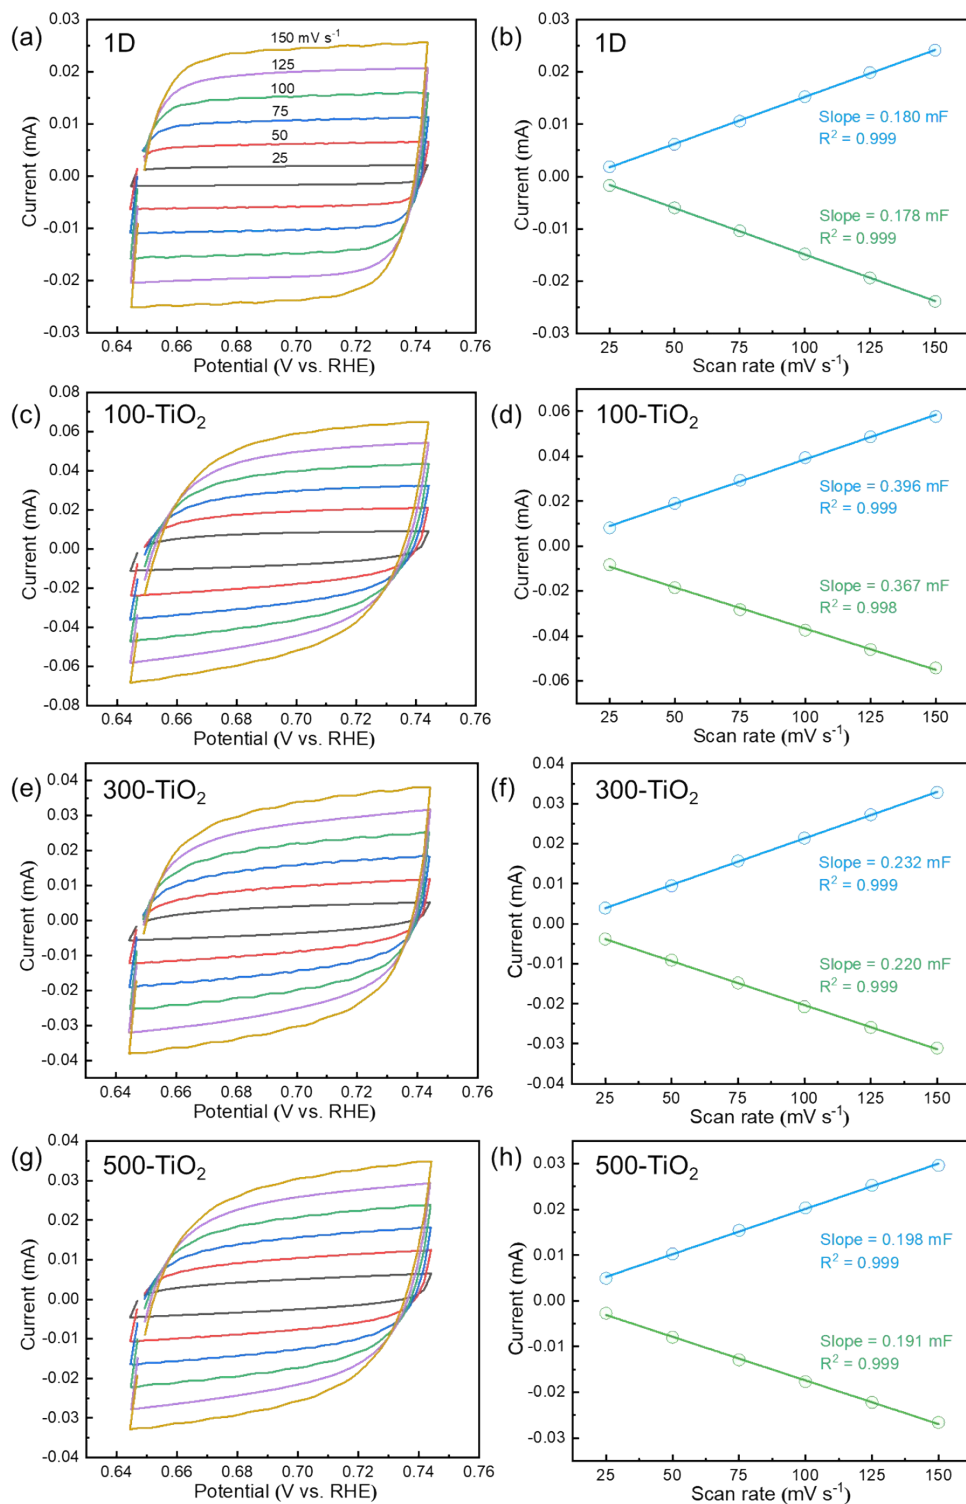

**Figure S14.** CV profiles of the (a) 1D, (c) 100-TiO<sub>2</sub>, (e) 300-TiO<sub>2</sub>, and (g) 500-TiO<sub>2</sub> electrode in a non-Faradaic potential region at different scan rates. (b, d, f, and h) The corresponding anodic and cathodic currents at the center of the potential window plotted as a function of scan rate to

estimate the double-layer capacitance. The calculated ECSA values of 1D, 100-TiO<sub>2</sub>, 300-TiO<sub>2</sub>, and 500-TiO<sub>2</sub> are 8.136, 17.341, 10.273, and 8.841 cm<sup>2</sup>, respectively.

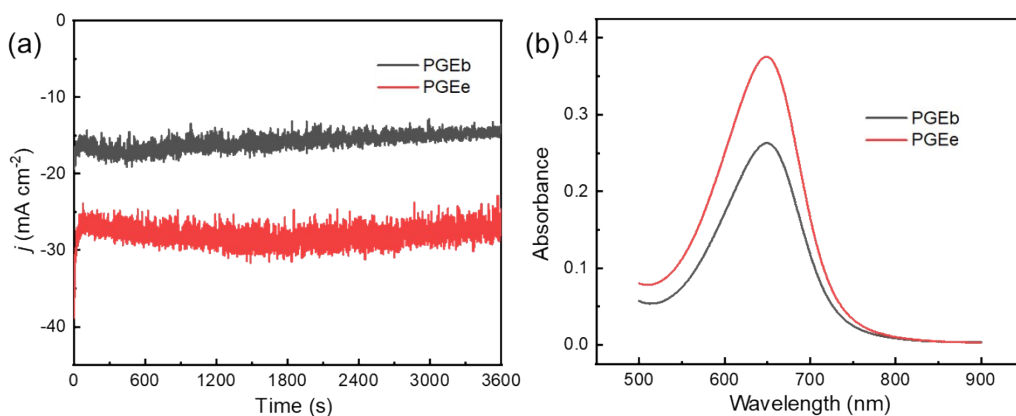

**Figure S15.** (a) Chronoamperometry curves of PGEb and PGEe at -1.06 V vs. RHE, and (b) corresponding UV-vis absorption spectra of the electrolysis solutions.

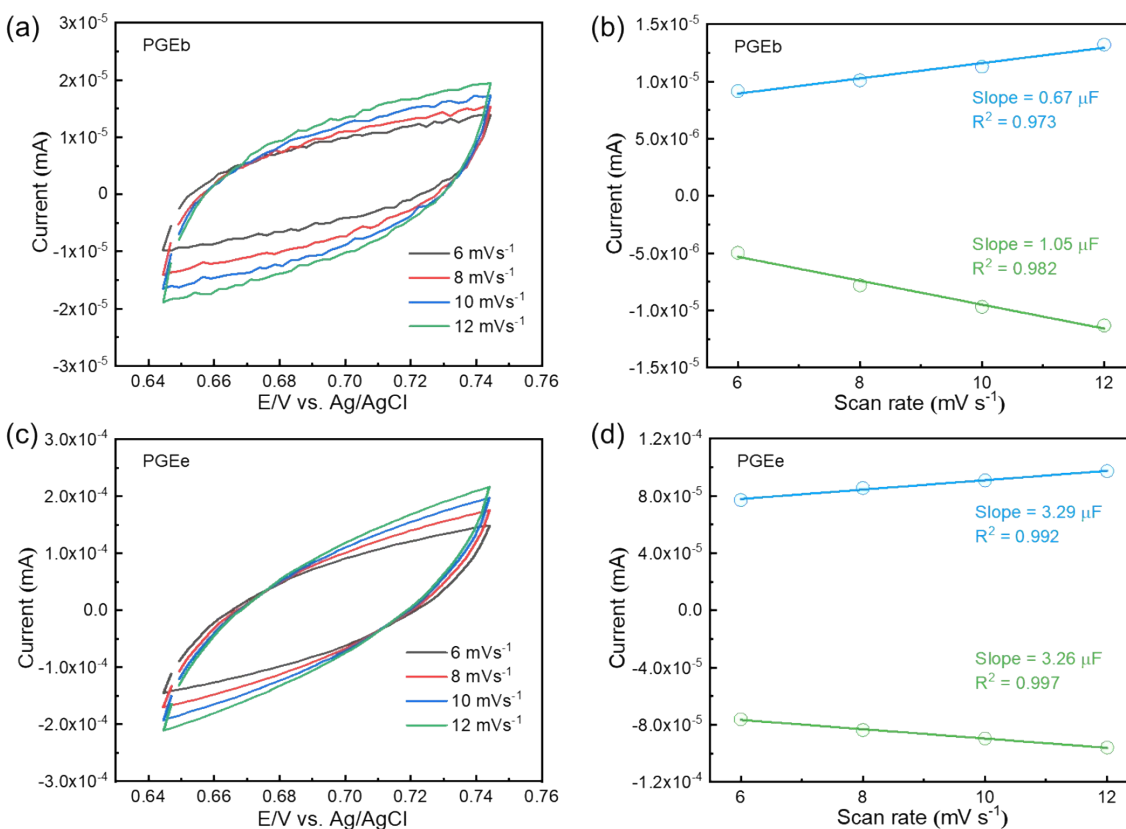

**Figure S16.** CV profiles of the (a) PGEb and (c) PGEe in a non-Faradaic potential region at different scan rates. (b, d) The corresponding anodic and cathodic currents at the center of the

potential window plotted as a function of scan rate to estimate the double-layer capacitance. The calculated ECSA values of PGEb and PGEe are  $0.039 \text{ cm}^2$  and  $0.149 \text{ cm}^2$ , respectively.

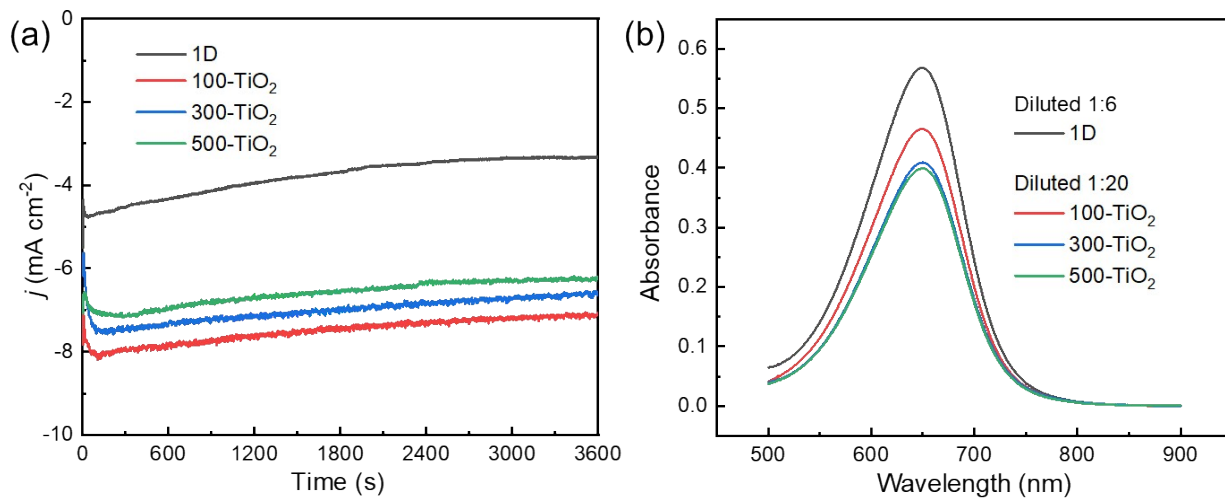

**Figure S17.** (a) Chronoamperometry curves and (b) corresponding UV-vis absorption spectra of electrolysis solutions of 1D, 100-TiO<sub>2</sub>, 300-TiO<sub>2</sub>, and 500-TiO<sub>2</sub> at -1.06 V vs. RHE.

## References

- [1] W. Gao, C. Iffelsberger, M. Pumera, Dual polymer engineering enables high-performance 3D printed Zn-organic battery cathodes, *Appl. Mater. Today*, 28 (2022) 101515, <https://doi.org/10.1016/j.apmt.2022.101515>.
- [2] C.C. McCrory, S. Jung, J.C. Peters, T.F. Jaramillo, Benchmarking heterogeneous electrocatalysts for the oxygen evolution reaction, *J. Am. Chem. Soc.*, 135 (2013) 16977-16987, <https://doi.org/10.1021/ja407115p>.
